## 26 **Abstract**

27

28 Intrauterine growth restriction (IUGR) is a serious condition which impairs the  
29 achievement of the fetus full growth potential and occurs in a natural and severe  
30 manner in pigs. Knowledge on skeletal muscle morphofunctional phenotype and its  
31 molecular regulation in IUGR pigs is important to understand postnatal muscle  
32 development and may help the establishment of therapies to improve skeletal muscle  
33 growth in those individuals. To investigate the impairment of skeletal muscle  
34 postnatal development due to IUGR, we evaluated the histomorphometrical pattern  
35 of the semitendinosus muscle, the Myosin Heavy Chain (embryonic, I, IIa, IIb and IIx  
36 MyHC) fiber composition and the relative expression of genes related to myogenesis,  
37 adipogenesis and growth during three specific periods: postnatal myogenesis  
38 (newborn to 100 days of age), postnatal development (newborn to 150 days of age),  
39 and hypertrophy (100 days to 150 days of age), comparing IUGR and normal birth  
40 weight (NW) pigs. Growth restriction in utero affected muscle fiber diameter, total  
41 fiber number and muscle cross sectional area which were smaller in IUGR pigs at  
42 birth ( $P < 0.05$ ). Even though the percentage of MyHC-I myofibers was higher in  
43 IUGR females at birth ( $P < 0.05$ ), in older gilts, a lower percentage of MyHC-IIx  
44 isoform ( $P < 0.05$ ) and the presence of emb-MyHC were also observed in that  
45 experimental group. Regarding the pattern of gene expression in the postnatal  
46 myogenesis period, growth restriction in utero led to a down regulation of myogenic  
47 factors, which delayed the expression of signals that induces skeletal muscle  
48 myogenesis (*PAX7*, *MYOD*, *MYOG*, *MYF5* and *DES*). Taken together, the muscle  
49 morphofunctional aspects described and their ontogenetic regulation define the

50 possible molecular origins of the notorious damage to the postnatal musculature  
51 development in IUGR pigs.

52

53 Key words: birth weight, IUGR, MyHC, myogenesis, skeletal muscle.

54

## 55 **Introduction**

56 Intrauterine growth restriction (IUGR) is defined as the impaired development  
57 of the mammalian fetus, or its organs, preventing it from reaching its full growth  
58 potential. This condition is characterized by low birth weight and is considered the  
59 second cause of infant mortality in the world [1]. It is also associated to the  
60 predisposition to certain chronic diseases (e.g. hypertension, obesity and diabetes) in  
61 adulthood. The main cause of IUGR is an insufficiency of the placenta in distributing  
62 enough nutrients and oxygen to the offspring [2].

63 IUGR is a significant problem not only in human neonatology but also in swine  
64 production. Breeding selection for increased litter size in this species has resulted in  
65 increased number of small piglets at birth, in particular those affected by IUGR [3] [4]  
66 [5]. In this species, growth restriction *in utero* is mainly caused by uterine crowding,  
67 resulting in asymmetrical IUGR [6] [7]. Moreover, this condition may increase the risk  
68 of neonatal morbidity or affect the piglets' postnatal growth performance [8] [9].

69 Recently, it was shown that proteins related to energy supply, metabolism and  
70 structure, function and proliferation of the skeletal muscle cells were differentially  
71 expressed in IUGR-affected piglets [10]. For these reasons, IUGR is related to  
72 economic problems for meat production, such as reduced feed conversion efficiency,  
73 decreased percentage of meat [11] and increased percentage of body fat in the  
74 carcass [12]. Additionally, the pig provides an excellent animal model to translational

75 medicine implications of IUGR, as it shows similarities with humans regarding  
76 anatomy, metabolism, and rapid postnatal growth rate [7] [13] [14].

77         There is evidence that postnatal characteristics determined by IUGR are  
78 programmed during intrauterine development [15]. Compared to brain and heart,  
79 skeletal muscle and adipose tissue have a lower priority for nutrients repartitioning,  
80 which makes these tissues especially vulnerable to nutritional deficiency *in utero* [16].  
81 Thus, IUGR individuals exhibit compromised postnatal growth [17] [18] which may be  
82 due to skeletal muscle damage [19] and delayed skeletal muscle maturity [20].

83         At the molecular level, skeletal muscle development during postnatal life is  
84 dependent on prenatal myogenesis [21]. In the vertebrata clade, molecular factors  
85 involved in myogenesis participate hierarchically in both intrauterine and postnatal  
86 muscle development [22] [23]. During the prenatal period, cells recruited to the  
87 myogenic lineage are the embryonic muscle progenitors, while in the postnatal  
88 period, these progenitor cells are quiescent, located at the periphery of the muscle  
89 fiber, and referred to as satellite cells [21] [24]. These later cells are of great  
90 importance for skeletal muscle myogenesis in the postnatal period. Under the same  
91 genetic hierarchy that determines embryonic myogenesis, satellite cells are recruited  
92 to the myogenic lineage by the *PAX7* gene, giving rise to myoblasts. On the other  
93 hand, some myoblasts can eventually return to the quiescent state (satellite cells) or  
94 the expression of *MYF5* and *MYOD* commit cells to the myogenic program. Finally,  
95 the expression of *MYOG* (Myogenin), a terminal differentiation gene, will characterize  
96 the muscle differentiation state: formation of myotubes/myofibers [21] [24].

97         In this context, knowing that IUGR imposes a limitation on skeletal muscle  
98 postnatal development, it is imperative to characterize the morphological  
99 modifications and molecular mechanisms that govern it. This knowledge may reveal

100 the biological targets for future therapeutic interventions to improve postnatal  
101 myogenesis in IUGR individuals.

102

## 103 **Materials and Methods**

### 104 **Animals and experimental design**

105 Sixty newborn female pigs DB-DanBred genotype (crossbred between  
106 Landrace and Large White breeds) from 30 litters, born to 4<sup>th</sup> - 6<sup>th</sup> parity sows, in  
107 litters of 10 to 15 total born piglets were selected immediately after birth (before they  
108 had suckled colostrum) and were divided into two birth weight categories: normal  
109 weight (NW: birth weight range from 1.4 to 1.7 kg; n=30) and intrauterine growth  
110 restricted (IUGR: birth weight range from 0.7 to 1.0 kg; n=30) littermates. The criteria  
111 used at selection were based on the concept of intrauterine crowding as performed in  
112 a previous study [17]. Birth weight ranges for each experimental group were  
113 determined as mean +1 standard deviation (SD) to mean +2 SD for the NW group  
114 and mean – 2 SD to mean – 1 SD for the IUGR group, based on the average (mean)  
115 and the SD of birth weights previously obtained from 1,000 newborn piglets of the  
116 same genetic line [25]. Runts, defined as piglets weighing less than 700 g, were  
117 excluded. Furthermore, in order to overcome possible litter birth weight effects on  
118 fetal development [26], the piglets selected belonged to litters whose mean birth  
119 weight ranged from 1.25 kg to 1.65 kg based on the average litter birth weight  
120 registered at the farm in the previous year.

121 At the end of selection, three experimental groups were obtained: one sub-set  
122 of 10 pairs of female littermates from each experimental group which was euthanized  
123 at birth (newborn - NB), one sub-set of 10 female littermates euthanized at 100 days

124 of age (juvenile) and one sub-set of 10 pairs of female littermates from each  
125 experimental group euthanized at 150 days of age (adult). In the sub-set necropsied  
126 at birth, some organs (e.g. heart, pancreas, liver, spleen, small intestine, large  
127 intestine, kidneys, semitendinosus muscle and brain) were weighed and the  
128 occurrence of IUGR was confirmed by comparing the brain to liver weight ratio,  
129 according to Alvarenga and colleagues [17]. The other sub-sets were reared in group  
130 pens, grouped by birth weight class, until the finishing period (~150 days of age).

131 Feed and water were provided *ad libitum* throughout the nursery and growing-  
132 finishing phases. Pigs were fed standard nursery and growing-finishing diets  
133 expected to meet requirements for lean growth performance. Piglets were weaned at  
134 23.1 days old on average; the nursery period lasted six weeks, and the growing-  
135 finishing phase lasted 12 weeks. Individual body weight of the females was recorded  
136 at weaning, and at the end of the nursery and growing-finishing periods, without  
137 restriction of feed and water. The experimental protocol was approved by the Ethical  
138 Committee in Animal Experimentation of the Federal University of Rio Grande do Sul  
139 (protocol #23732).

140

## 141 **Tissue preparation**

142 Following euthanasia, samples of the semitendinosus muscle were taken from  
143 the muscle origin, which is the muscle extreme close to the ischiatic tuber, and were  
144 subjected to different processing steps, according to the histomorphometrical,  
145 immunofluorescence, and gene expression analysis. For histomorphometrical  
146 evaluations, samples of 1-2 mm thickness were fixed through immersion in 5% (w/v)  
147 glutaraldehyde (Biological Grade, EMS, #16500) in 0.05M phosphate buffer pH 7.3  
148 for 24 hours, dehydrated in increasing concentrations of ethanol, embedded in glycol

149 methacrylate plastic resin (Historesin, Leica, Heidelberg, Germany), sectioned at 3  
150  $\mu\text{m}$  thickness and stained with toluidine blue-sodium borate [27]. To perform  
151 immunofluorescence quantification of muscle fiber types, samples were fixed in 4%  
152 paraformaldehyde (w/v) in 0.05M phosphate buffer pH 7.3 for 24 hours and  
153 embedded in Paraplast (Sigma Aldrich, São Paulo, Brazil). Sections of 5  $\mu\text{m}$   
154 thickness were placed on silanized slides. For gene expression studies, fresh muscle  
155 samples were preserved in RNA holder (Bio Agency, São Paulo, Brazil) for 24 hours  
156 overnight at 4°C and subsequently stored at -20°C.

157

## 158 **Histomorphometrical analyses**

### 159 **Muscle cross sectional area and fiber number**

160 Before embedding, muscle samples from newborn piglets were placed on an  
161 acetate sheet and their transversal circumference drawn. These drawings were  
162 scanned and the total cross sectional area of each muscle sample calculated through  
163 an analysis program (Image J, 1.49v – free version, National Institutes of Health,  
164 Bethesda, MD, USA). Additionally, 10 randomly selected histological fields were used  
165 per animal to calculate the number of fibers per area ( $\text{mm}^2$  - fiber density). These  
166 values were obtained using the same analysis program at a final magnification of 80x  
167 (newborn) and 40x (100-d and 150-d old animals). Finally, the muscle fiber density  
168 and the total cross sectional area values of the semitendinosus muscle in the  
169 newborn animals were used to calculate the total muscle fiber number per sample.  
170 As the whole semitendinosus muscle in both 100-d and 150-d old is large and very  
171 heavy, it was unfeasible to manipulate them at the slaughter house. Therefore, the  
172 information on muscle area, and consequently total muscle fiber number, is missing  
173 in those experimental groups.

## 174 **Muscle fiber diameter**

175           The diameter of the muscle fibers cross section [28] was determined using  
176 digital images randomly selected in the NB, 100-d and 150-d old pigs. Approximately  
177 250 muscle fibers, chosen at random, from five animals of each experimental group,  
178 were measured resulting in a total of 1,250 fibers in the NW and IUGR groups. The  
179 diameter was measured using the analysis software Image J Software (1.49v – free  
180 version, National Institutes of Health, Bethesda, MD, USA).

181

## 182 **Volumetric density of muscular components**

183           The volumetric density (%) of the muscular components, including muscle  
184 fibers, interstice, adipocytes and blood vessels for the three ages studied was  
185 obtained by point counting. Ten randomly selected sections per animal in each  
186 experimental group were examined under a light microscope (Olympus BX-51), with  
187 a 10x eyepiece fitted with a square lattice containing 284 intersections. Ten fields  
188 (total of 2,840 points) were randomly selected per animal at 400X magnification. The  
189 number of intersections on pertinent structures over the entire tissue section was  
190 counted by predetermined and systematic movement of sections across the grid  
191 without overlap.

192           Volume density of each muscular component was obtained by dividing the  
193 sum of points falling on each structure by the total number of points over the tissues.  
194 The results were expressed as a percentage of the muscle volume obtained by  
195 multiplying the volume density of each muscular component by 100.

196

197

198



## 199 Immunofluorescence

200 To identify and quantify muscle fiber types (Myosin Heavy Chain - MyHC) type  
201 I and the isomeric forms type II (IIa, IIb and IIx) in the semitendinosus muscle,  
202 immunofluorescence was performed. Moreover, to evaluate the maturation of muscle  
203 fibers, the presence of the embryonic isoform (emb-MyHC) was also evaluated in  
204 NB, 100-d and 150-d old animals from both experimental groups. Myosin Heavy  
205 Chain is a sarcomeric protein, part of a complex which is essential for muscle  
206 development (embryonic isoform) and for slow (type-I) or fast (type-II) muscle  
207 contraction.

208 Briefly, sections were dewaxed, rehydrated and microwaved for 3 X 5 minutes  
209 in 0.1M sodium citrate buffer (pH 6.0) for epitope antigen retrieval, cooled down to  
210 room temperature and rinsed with phosphate buffered saline pH 7.4 (PBS). Blocking  
211 of reactive aldehyde groups was carried out with 100% (v/v) methanol for 30 minutes.  
212 Sections were maintained in Tween 20 solution (0.1% v/v in PBS) and blocked with  
213 1% (w/v) of BSA in Dulbecco's PBS for 30 minutes at 4°C. All samples were  
214 subjected to overnight incubation (12 to 15h at 4°C) with five different primary  
215 antibodies (**Table 1**). Negative controls were maintained without primary antibodies  
216 in PBS at 4°C. All sections were then incubated (90 min at 4°C) with their respective  
217 secondary antibody (**Table 1**). Finally, nuclei were stained using DAPI, and slides  
218 were mounted with glycerol 50% (v/v in Dulbecco's PBS). For evaluation of slow and  
219 fast contraction muscle fibers, samples of rabbit semitendinosus muscle were used  
220 as positive and negative controls, according to the manufacturer, and for muscle  
221 fibers maturation, newborn pig tissues were used as positive and negative controls.

222

223 **Table 1. Description of primary and secondary antibodies used in the**  
 224 **immunofluorescence analysis to identify immature (embryonic), slow (I) and**  
 225 **fast (IIa, IIb and IIx) Myosin Heavy Chain (MyHC) protein isoforms in the pig**  
 226 **semitendinosus muscle. IgG and IgM isotype primary antibodies were**  
 227 **recognized by IgG and IgM isotype secondary antibodies, respectively.**

**Primary antibodies**

| <b>Anti MyHC</b> | <b>Host</b> | <b>Isotype</b> | <b>Clonality</b> | <b>Dilution (in PBS)</b> | <b>ID Product</b> | <b>Company</b> |
|------------------|-------------|----------------|------------------|--------------------------|-------------------|----------------|
| Embryonic        | Mouse       | MIgG1          | Monoclonal       | 1:200                    | BF-45             | DSHB           |
| I                | Mouse       | IgG1           | Monoclonal       | 1:100                    | NCL-MHCs          | Leica          |
| IIa              | Mouse       | MIgG1          | Monoclonal       | 1:100                    | SC-71             | DSHB           |
| IIb              | Mouse       | MIgM           | Monoclonal       | 1:100                    | BF-F3             | DSHB           |
| IIx              | Mouse       | MIgG1          | Monoclonal       | 1:100                    | BF-35             | DSHB           |

  

| <b>Secondary antibodies</b> |                |                  |                        |                 |                   |                |
|-----------------------------|----------------|------------------|------------------------|-----------------|-------------------|----------------|
| <b>Host anti reactivity</b> | <b>Isotype</b> | <b>Clonality</b> | <b>Wavelength (nm)</b> | <b>Dilution</b> | <b>ID Product</b> | <b>Company</b> |
| Rabbit anti mouse           | IgG            | Polyclonal       | 555                    | 1:200           | A-21422           | Thermo Fisher  |
| Goat anti mouse             | IgM            | Polyclonal       | 633                    | 1:200           | A-21046           | Thermo Fisher  |

228

229 The quantification of MyHC muscle fibers was obtained through the Zen  
 230 software (Blue edition 2.3 – free version, Carl Zeiss Microscopy GmbH, 2011). The  
 231 proportion of MyHC muscle fiber types was calculated by the ratio between the  
 232 number of MyHC (-I, -IIa, -IIb) positive and the total number of muscle fibers (positive  
 233 plus negative), in at least three fields of the semitendinosus muscle cross sections  
 234 per animal. Since MyHC IIx fibers are not recognized by the antibody, the  
 235 identification of these myofiber types was made considering only the negative cells,  
 236 and further proportion was calculated as previously described. In the same fields, the  
 237 evaluation of the MyHC fiber types' diameter (Feret's diameter - Dubach-Powell,  
 238 2011) was performed through the Image J software. Hybrid fibers were ignored.

239

240 **Relative expression of myogenic, adipogenic and growth-related**  
 241 **genes by RT-qPCR**

242 To understand the molecular mechanisms of postnatal skeletal muscle  
243 development, the relative expression of some myogenic, adipogenic and growth-  
244 related genes was quantified by RT-qPCR. The protein interaction network of those  
245 genes was established, using STRING database (version 10.5 – <http://string-dg.org/>)  
246 [29] with minimum required interaction score defined as higher confidence (0.700)  
247 **(Fig 1)**.

248

249 **Fig 1. Predicted protein interaction network of the respective myogenic,**  
250 **adipogenic and growth-related genes involved in postnatal skeletal muscle**  
251 **development of higher mammalian.** Nodes represent the proteins originated from  
252 their respective genes. When connected by edges, these proteins have known  
253 interactions. When isolated, these proteins have no physical or functional  
254 interactions.

255

256 Total RNA was isolated using Trizol® Reagent (Life Technologies) following  
257 manufacturer's instructions and its quality was evaluated using the Agilent RNA  
258 Screen Tape System and Agilent RGK Screen Tape System (Agilent Technologies,  
259 Mississauga, Ontario, CA) protocols. From each sample, 1 µg of total RNA was  
260 converted in cDNA, following the High Capacity cDNA Reverse Transcription Kit  
261 (Applied Biosystems – Life Technologies, Burlington, Ontario), from both oligo d(T)  
262 and random primers. Primers were designed based on pig mRNA sequences  
263 available at the Ensembl database (**Table 2**).

264 **Table 2. Myogenic, adipogenic and growth-related genes selected for evaluation by RTq-PCR, with their symbols,**  
 265 **ensembl access code, forward and reverse sequence and reference.**

266

| Genes                                 | Symbol        | Ensembl access code | Forward                  | Reverse                  | Reference |
|---------------------------------------|---------------|---------------------|--------------------------|--------------------------|-----------|
| <b>Myogenic</b>                       |               |                     |                          |                          |           |
| Myogenic differentiation 1            | <i>MYOD1</i>  | ENSSSCG00000013375  | CCGACGGCATGATGGATTATAG   | CGACACCGCAGCATTCTT       | [30] [31] |
| Myogenin                              | <i>MYOG</i>   | ENSSSCG00000034654  | GGCTACGAGCGGACTGA        | GACACGGACTTCCTCTTACAC    | [30] [31] |
| Myogenic factor 5                     | <i>MYF5</i>   | ENSSSCG00000000937  | CGTCTAGTTCCAGGCTCATCTA   | GCCTCCTTCTCCTGTGTAATA    | [30] [31] |
| Myostatin                             | <i>MSTN</i>   | ENSSSCG00000016047  | TGAGACTCATCAAACCCATGAA   | CATCAATGCTCTGCCAAATACC   | [32]      |
| Creatine kinase M-type                | <i>CKM</i>    | ENSSSCG00000036132  | GGAGAAAGGAGGCAACAT       | TAGACGGGCAGGTGAGC        | [33]      |
| Desmin                                | <i>DES</i>    | ENSSSCG00000020785  | GAGAACAATTTGGCTGCCTTC    | GGATCTCCTCTTCGTGTACTTTC  | [34]      |
| Paired box 7                          | <i>PAX7</i>   | ENSSSCG00000034627  | TGAGGAGTACAAGAGGGAGAA    | GGACAGTGCTGCGATCA        | [35]      |
| Paired box 3                          | <i>PAX3</i>   | ENSSSCG00000028418  | CTGCCGACTTCTCAGTCTTATT   | CTTTGTCCATACTGCCCATACT   | [35]      |
| Actin gamma 2                         | <i>ACTG2</i>  | ENSSSCG00000008294  | TTGGTAACAGGTCCCAGAAAG    | GAATCCAGGACGATGCCTAAG    | [36]      |
| Actin beta like 2                     | <i>ACTBL2</i> | ENSSSCG00000016923  | CCCTCACTCGAAAGAAGCTATG   | CTGGACTCAATGCCCAGAAA     | [37]      |
| <b>Adipogenic</b>                     |               |                     |                          |                          |           |
| Fatty acid-binding protein 4          | <i>FABP4</i>  | ENSSSCG00000040681  | CCTGAAGGTTACGGCTTCTT     | CCCCTCCCACTTCTTTTCAT     | [38] [39] |
| Lipoprotein lipase                    | <i>LPL</i>    | ENSSSCG00000040631  | ACCGTTGCAACAACCTGGGCTATG | ACTTTGTAGGGCATCTGAGCACGA | [40]      |
| Leptin receptor                       | <i>LEPROT</i> | ENSSSCG00000003806  | CAGCAATCCCTACCGAAAGA     | AGAAGGAAAGGTGTGGTGAAG    | [41]      |
| <b>Growth-related</b>                 |               |                     |                          |                          |           |
| Growth hormone receptor               | <i>GHR</i>    | ENSSSCG00000016866  | TCCCAGACTATACCTCCATTCA   | AGCCACACGATGAGAGAAAC     | [42]      |
| Insulin like growth factor 1 receptor | <i>IGF1R</i>  | ENSSSCG00000030560  | GATGGGTTTCATTGCGTGTTG    | AGCTGAGAAGAGGAGTTTGTATG  | [42] [43] |
| Insulin like growth factor            | <i>IGF1</i>   | ENSSSCG00000000857  | GACCTTCTGAAGAGTGAAGAAT   | TTTGGTAGGTCTTCTGGTGTTT   | [42] [44] |

268 RT-qPCR was conducted using Fast SYBR® Green Master Mix (Applied  
269 Biosystems), 0.4-0.8 mM of each primer, and 1 µL of each 1:10 diluted cDNA, in a  
270 final volume of 10 µL. Reactions were performed in a 7900 Real-Time PCR Machine  
271 (Applied Biosystems), using the following cycling parameters: 50°C × 2 min, 95°C × 2  
272 min, followed by 40 cycles of 95°C × 15 sec, 60-62°C × 30 sec, and 72°C × 20 sec.  
273 The dissociation step was performed at the end of the amplification step to allow the  
274 identification of the specific melting temperature for each primer set. All reactions  
275 were performed with technical duplicate and experimental triplicate (NW) or  
276 quintuplicate (IUGR). The calibration curve data such as the mean slope, intercept,  
277 PCR efficiency and R<sup>2</sup> values are shown in **S1 Table**.

278 The relative gene expression analysis was calculated using the 2<sup>-ΔΔCt</sup> method  
279 [45], and was analyzed from newborn (NB) until adulthood comparing, in each group,  
280 the three postnatal periods as follows: (i) postnatal myogenesis, where NB and 100-d  
281 samples were used; (ii) postnatal development, where NB and 150-d old samples  
282 were used; and (iii) hypertrophy, where 100-d and 150-d old samples were used.  
283 Results are expressed as the difference of the relative gene expression between  
284 ages.

285

## 286 **Statistical analysis**

287 All variables measured were tested for normality prior to analyses, using the  
288 univariate procedure of the Statistical Analysis System (SAS Institute Cary, NC, USA,  
289 version 8.2). Data were analyzed as a randomized complete block design, each  
290 block consisting of two littermates. The statistical model included birth weight class  
291 and block as fixed factors and pig as random factor.

292 Treatment effects on growth performance, histomorphometrical analysis, and  
293 muscle fiber types were analyzed using the general linear model (GLM) procedure of  
294 SAS. Least square means were compared using the Student's t-test with  $P < 0.05$   
295 being considered significant. In the tables and figures, data are reported as least  
296 square means and the pooled SEM. The relative expression of myogenic, adipogenic  
297 and growth-related genes were analyzed using the Relative Expression Software  
298 Tool (REST 2009, QIAGEN).

299

## 300 Results

### 301 Newborn group data and postnatal growth performance

302 The organs weights and the brain to liver weight ratio of the newborn piglets  
303 are shown in **Table 3**. All organs of NW piglets, including the brain, were heavier  
304 than the organs of their IUGR counterparts ( $P < 0.01$ ). The brain to liver weight ratio  
305 was increased in IUGR piglets ( $P < 0.05$ ), which confirms the occurrence of  
306 intrauterine growth restriction. NW animals presented higher body weight at birth (**Fig**  
307 **2**), and these differences were maintained throughout the postnatal period (weaning,  
308 nursery and grower/finisher) ( $P < 0.05$ ).

309

310 **Table 3. Organ weights (g) and brain/liver weight ratio in normal weight (NW)**  
311 **and intrauterine growth restriction (IUGR) newborn piglets.**

312

| Parameters       | Experimental groups |                   | SEM  |
|------------------|---------------------|-------------------|------|
|                  | NW                  | IUGR              |      |
| N                | 10                  | 10                |      |
| Birth weight, kg | 1.5 <sup>a</sup>    | 0.9 <sup>b</sup>  | 0.01 |
| Small intestine  | 62.6 <sup>a</sup>   | 36.6 <sup>b</sup> | 2.10 |
| Large intestine  | 16.8 <sup>a</sup>   | 10.6 <sup>b</sup> | 0.30 |
| Liver            | 43.8 <sup>a</sup>   | 23.9 <sup>b</sup> | 1.20 |
| Heart            | 10.5 <sup>a</sup>   | 6.7 <sup>b</sup>  | 0.25 |
| Brain            | 28.7 <sup>a</sup>   | 25.2 <sup>b</sup> | 0.40 |
| Stomach          | 9.0 <sup>a</sup>    | 5.8 <sup>b</sup>  | 0.30 |
| Brain: Liver     | 0.7 <sup>a</sup>    | 1.1 <sup>b</sup>  | 0.04 |

<sup>a,b</sup> Within a row, LSmeans with different superscripts differ ( $P < 0.05$ ).

313

314

315 **Fig 2. Postnatal growth curve (kg) from normal weight (NW) and intrauterine**  
316 **growth restricted (IUGR) gilts. \*  $P < 0.05$**

317

## 318 **Histomorphometrical analysis**

319 The histomorphometrical analyses of the semitendinosus muscle in both  
320 experimental groups at the ages evaluated are summarized in **Table 4**. These  
321 analyses revealed that growth restriction *in utero* did not affect the proportions of  
322 muscular components in the NB group ( $P > 0.05$ ). On the other hand, NW newborn  
323 pigs had greater muscle fiber diameter and consequently lower fiber density  
324 (fibers/mm<sup>2</sup>), compared to their IUGR littermates ( $P < 0.01$ ). In addition, the cross-  
325 sectional area of the semitendinosus muscle was smaller in IUGR females from the  
326 NB subgroup ( $P < 0.05$ ).

327

328 **Table 4. Histomorphometrical analyses of the semitendinosus muscle of**  
329 **newborn, 100-d and 150-d old pigs from normal weight (NW) and intrauterine**  
330 **growth restricted (IUGR) experimental groups.**

| Parameters                             | NB                 |                    |      | 100 days          |                   |      | 150 days          |                   |      |
|----------------------------------------|--------------------|--------------------|------|-------------------|-------------------|------|-------------------|-------------------|------|
|                                        | NW                 | IUGR               | SEM  | NW                | IUGR              | SEM  | NW                | IUGR              | SEM  |
| N                                      | 5                  | 5                  |      | 5                 | 5                 |      | 5                 | 5                 |      |
| Volumetric proportion (%)              |                    |                    |      |                   |                   |      |                   |                   |      |
| Muscle fiber                           | 74.4 <sup>a</sup>  | 76.0 <sup>a</sup>  | 2.8  | 90.2 <sup>a</sup> | 88.4 <sup>a</sup> | 1.9  | 91.0 <sup>a</sup> | 91.1 <sup>a</sup> | 1.5  |
| Adipocyte                              | 2.1 <sup>a</sup>   | 0.7 <sup>a</sup>   | 0.8  | 1.7 <sup>a</sup>  | 0.8 <sup>a</sup>  | 0.6  | 2.9 <sup>a</sup>  | 4.1 <sup>a</sup>  | 1.6  |
| Interstice                             | 23.3 <sup>a</sup>  | 23.4 <sup>a</sup>  | 2.3  | 8.0 <sup>a</sup>  | 10.7 <sup>a</sup> | 1.5  | 6.3 <sup>a</sup>  | 6.8 <sup>a</sup>  | 0.9  |
| Blood vessels                          | 0.10 <sup>a</sup>  | 0.10 <sup>a</sup>  | 0.07 | 0.10 <sup>a</sup> | 0.15 <sup>a</sup> | 0.09 | 0.10 <sup>a</sup> | 0.20 <sup>a</sup> | 0.07 |
| Muscle fiber diameter (µm)             | 18.3 <sup>a</sup>  | 15.3 <sup>b</sup>  | 0.6  | 63.3 <sup>a</sup> | 65.3 <sup>a</sup> | 3.0  | 71.0 <sup>a</sup> | 77.0 <sup>a</sup> | 6.7  |
| Density (fibers/mm <sup>2</sup> )      | 4,470 <sup>a</sup> | 6,120 <sup>b</sup> | 417  | 435 <sup>a</sup>  | 597 <sup>a</sup>  | 80   | 397 <sup>a</sup>  | 274 <sup>a</sup>  | 45   |
| Muscle CSA* (cm <sup>2</sup> )         | 1.12 <sup>a</sup>  | 0.72 <sup>b</sup>  | 0.07 | -                 | -                 | -    | -                 | -                 | -    |
| Total fiber number (x10 <sup>3</sup> ) | 6,250 <sup>a</sup> | 4,270 <sup>b</sup> | 11   |                   |                   |      |                   |                   |      |

331 \*CSA=cross sectional area.

332 <sup>a,b</sup> Within a row, LS means with different superscripts differ (P < 0.05).

333

334 Even though muscle fiber diameter and density as well as muscle cross-  
 335 sectional area were different in the newborn animals, these differences were not  
 336 apparent over time, as both NW and IUGR animals showed similar muscle fibers  
 337 diameter and density at 100 and 150 days of age (P > 0.05).

338

## 339 Evaluation of muscle fiber types

340 The NW group presented emb-MyHC protein isoform only at birth; this fiber  
 341 type was absent at the later stages of postnatal development (**Table 5; Fig 3**).  
 342 However, IUGR animals presented different fiber type composition, as emb-MyHC  
 343 could also be detected in 100-d and 150-d old females (**Figs 3B and D**). At birth, the  
 344 IUGR piglets showed almost the double of the proportion of MyHC-I (slow-twitch

345



346 **Table 5. Quantification of Myosin Heavy Chain (MyHC) fiber types in the**  
 347 **semitendinosus muscle in newborn (NB), 100-d and 150-d old gilts from normal**  
 348 **weight (NW) or intrauterine growth restricted (IUGR) experimental groups.**

349

| MyHC fiber types* | NB                |                   |     | 100-d             |                   |      | 150-d             |                   |      |
|-------------------|-------------------|-------------------|-----|-------------------|-------------------|------|-------------------|-------------------|------|
|                   | NW                | IUGR              | SEM | NW                | IUGR              | SEM  | NW                | IUGR              | SEM  |
| N                 | 3                 | 3                 | -   | 3                 | 3                 | -    | 3                 | 3                 | -    |
| Embryonic         | Present           | Present           | -   | Absent            | Present           | -    | Absent            | Present           | -    |
| I                 | 15.2 <sup>a</sup> | 29.0 <sup>b</sup> | 2.8 | 0.13 <sup>a</sup> | 0.08 <sup>a</sup> | 0.06 | 0.10 <sup>a</sup> | 0.04 <sup>a</sup> | 0.03 |
| Ila               | -                 | -                 | -   | 0.07 <sup>a</sup> | 0.18 <sup>a</sup> | 0.07 | 0.08 <sup>a</sup> | 0.20 <sup>a</sup> | 0.03 |
| Ilb               | -                 | -                 | -   | 0.15 <sup>a</sup> | 0.18 <sup>a</sup> | 0.05 | 0.10 <sup>a</sup> | 0.18 <sup>a</sup> | 0.02 |
| Ilx               | -                 | -                 | -   | 0.90 <sup>a</sup> | 0.81 <sup>a</sup> | 0.04 | 0.90 <sup>a</sup> | 0.77 <sup>b</sup> | 0.03 |

350 <sup>a,b</sup> Within a row, LS means with different superscripts differ (P < 0.05).

351 \* The results are expressed as presence or absence of the embryonic MyHC protein and percentage  
 352 (%) of total fibers for the other MyHC proteins.

353

354 oxidative) fibers compared to their NW counterparts, and yet this difference has  
 355 disappeared over time, as this fiber type frequency was similar in both 100-d or 150-d  
 356 old gilts (**Figs 3E-F** and **3G-H**). Regarding MyHC-II (fast-twitch glycolytic) muscle  
 357 fibers, neither types -Ila, -Ilb or -Ilx were affected by intrauterine growth restriction at  
 358 100-d of age. Interestingly, the proportions of MyHC-Ila and -Ilb were numerically  
 359 higher in IUGR females at 150-d of age but did not reach the level of significance  
 360 (p=0.059 and p= 0.087, respectively). However, growth restriction *in utero* affected  
 361 the proportion of MyHCII-x, which was lower in IUGR gilts (**Figs 3Q-R** and **3S-T**).  
 362 Furthermore, the hypertrophy capacity evaluated between 100-d and 150-d old pigs  
 363 revealed that it was lower in IUGR females in all MyHC fiber types evaluated (**Table**  
 364 **6**).

365

366 **Fig 3. Immunostaining of immature (embryonic – emb), slow (I) and fast (IIa, IIb**  
 367 **and IIx) twitch Myosin Heavy Chain (MyHC) protein isoform in the**  
 368 **semitendinosus muscle from normal weight (NW) and intrauterine growth**  
 369 **restricted (IUGR) pigs at 100-d and 150-d old. The bars represent 96 µm.**  
 370

371 **Table 6. Hypertrophy based on the Myosin Heavy Chain (MyHC) fiber types in**  
 372 **the semitendinosus muscle of 100-d until 150-d old pigs from normal weight**  
 373 **(NW) and intrauterine growth restricted (IUGR) animals.**  
 374

| MyHC | NW    |       |                           | IUGR  |       |                           | Hypertrophic capacity of IUGR related to NW (%)* |
|------|-------|-------|---------------------------|-------|-------|---------------------------|--------------------------------------------------|
|      | 150-d | 100-d | Hypertrophy (150d - 100d) | 150-d | 100-d | Hypertrophy (150d - 100d) |                                                  |
| I    | 3.47  | 1.12  | 2.35                      | 1.84  | 1.33  | 0.51                      | 22                                               |
| IIa  | 3.24  | 1.47  | 1.77                      | 2.98  | 1.37  | 1.60                      | 91                                               |
| IIb  | 3.34  | 1.46  | 1.88                      | 2.55  | 1.61  | 0.94                      | 50                                               |
| IIx  | 3.87  | 1.65  | 2.22                      | 3.33  | 1.99  | 1.33                      | 60                                               |

375 \*The hypertrophic capacity of IUGR pigs is based on the same parameter of their NW counterparts.

376  
 377 **Relative expression of myogenic, adipogenic and growth-**  
 378 **related genes in the semitendinosus muscle during**  
 379 **postnatal development**

380 The relative gene expression data revealed that in NW animals only *IGF1* was  
 381 found to be up-regulated ( $P < 0.001$ ) in the skeletal muscle from 100 d-old animals,  
 382 compared to the NB ones (postnatal myogenesis; **Fig 4A**). No other significant  
 383 differences were observed in the expression of the genes associated with muscle

384 development and homeostasis (*PAX3*, *PAX7*, *MYOD1*, *MYF5*, *MYOG*, *MSTN* and  
385 *CKM*, *DES*, *ACTG2*, *ACTBL2*), growth (*GHR* and *IGF1R*) and lipid metabolism  
386 (*FABP4*, *LPL* and *LEPOT*) between NB and 100 d-old samples. During the same  
387 period, however, IUGR skeletal muscle samples presented a different expression  
388 pattern: *MYOD*, *MYOG*, *MYF5*, *DES* and *PAX7* were all found to be down-regulated  
389 in 100 d-old samples, compared to the NB (**Fig 4A'**); while no significant differences  
390 were found in the other gene expression ratios.

391

392 **Fig 4. Gene expression evaluation from normal weight (NW) and intrauterine**  
393 **growth restriction (IUGR) pigs in three postnatal life phases: myogenesis (A-**  
394 **A'), postnatal development (B-B'), and hypertrophy (C-C').**

395

396 The analysis between 150 d-old and NB skeletal muscles (postnatal  
397 development) revealed a similar expression pattern for both NW and IUGR: all genes  
398 were found to be down-regulated in both samples, excluding *PAX3* in NW animals,  
399 which showed similar expression between those ages (**Fig 4B-B'**). However, the  
400 repression levels observed in IUGR samples were always at least five times higher  
401 than the ones observed in NW (i.e. *MSTN* expression level in the NW animals was  
402 0.036 -  $P < 0.001$ ; while in IUGR was 0.007 -  $P < 0.003$ ). The same tendency of gene  
403 repression was observed when the comparison was performed between 100 and 150  
404 d-old samples (hypertrophy; **Fig 4C-C'**).

405

406 **Discussion**

407           Several studies have investigated skeletal muscle alterations due to  
408 intrauterine growth restriction, and yet there is little information on postnatal  
409 myogenic program and its structural changes, including fiber type, to further elucidate  
410 the effects on postnatal muscle growth. It is well established that total muscle fiber  
411 number, which is determined during fetal stage, is a crucial component of postnatal  
412 growth, and postnatal skeletal muscle development is mainly due to the increase in  
413 muscle fiber size, with no net formation of new muscle fibers [46]. Since the number  
414 of muscle fibers formed during fetal stage is dependent on the number of available  
415 myogenic progenitor cells and their proliferation is highly sensitive to nutrient  
416 availability in utero [46], a better understanding of the impact of intrauterine growth  
417 restriction on skeletal muscle development is important.

418           Hence, the present study investigated morphofunctional alterations due to  
419 intrauterine growth restriction on skeletal muscle postnatal development in gilts and  
420 their possible postnatal myogenic program origins. In particular, it was shown that  
421 IUGR promotes structural changes in muscle fibers and alters the proportion of  
422 MyHC-I myofibers at birth, with smaller muscle fibers diameters and increased  
423 proportion of MyHC-I myofibers in IUGR animals, whose phenotype is related to  
424 postnatal myogenic program impairment. However, these structural changes did not  
425 persist over time and this may reflect a particular characteristic of the myofiber which  
426 is plasticity. To the best of our knowledge, this is the first report showing the skeletal  
427 muscle morphological phenotype and the gene expression profile of skeletal muscle  
428 development from birth to adulthood in IUGR individuals, using the pig as an  
429 experimental model.

430           Similar to previous studies [17] [47] where growth rates of different birth weight  
431 pigs were investigated, IUGR gilts showed lower body weights throughout the

432 postnatal development period. This may be due to the lower muscle fiber number  
433 observed in IUGR piglets at birth, as a positive correlation between muscle fiber  
434 number and performance traits has been previously reported [48] [49]. Besides the  
435 low number of muscle fibers, the smaller muscle fiber diameter and muscle cross  
436 sectional area observed in the IUGR group at birth may also contribute to the low  
437 growth rates reported in the IUGR females during all ages evaluated. Despite the  
438 differences in the semitendinosus histomorphometry at birth, the same parameters  
439 were not apparent at 100-d and 150 days of age, suggesting that muscle hypertrophy  
440 is not affected by IUGR. Indeed, similar pattern in the relative expression of genes  
441 during the hypertrophy period (100 to 150 days of age) confirms this finding.

442       Regarding the quantification of muscle fiber type, the proportion of MyHC-I  
443 myofibers was apparently not compromised by growth restriction *in utero* at 100-d  
444 and 150-d of age. These findings are in agreement with Choi and colleagues [50],  
445 which did not report any differences in the proportion and area of MyHC-I fibers  
446 relative to live weight at slaughter. Since higher proportion of MyHC-I fiber types  
447 contribute to superior meat quality [51], the present results suggest that IUGR may  
448 not have direct consequences for meat sensory quality characteristics. Indeed, the  
449 impact of birth weight on meat quality has been recently investigated by Alvarenga  
450 and colleagues [52], who reported a higher shear force in the Longissimus dorsi  
451 muscle from IUGR barrows. Interestingly, the presence of the embryonic MyHC  
452 isoform in the semitendinosus muscle of 100-d and 150-d old IUGR animals  
453 suggests muscle immaturity, once it was absent in NW animals at the same age.  
454 Hence, the presence of embryonic MyHC may impair muscle functionality in IUGR  
455 pigs. Our results corroborate with those reported by Perruchot and colleagues [20]

456 which demonstrated greater amount of the embryonic MyHC isoform in small fetuses,  
457 suggesting delayed myofiber development.

458 The molecular regulation of skeletal muscle postnatal myogenesis in IUGR  
459 animals still lack clarification, especially regarding postnatal development. In this  
460 regard, at the same age, while skeletal muscles from NW animals showed the up-  
461 regulation of *IGF1* expression, IUGR ones showed the down-regulation of the classic  
462 *PAX7*, *MYF5*, *MYOD* and *MYOG* myogenic regulatory factors (MRFs) and the  
463 cytoskeleton component *DES*. These results revealed the strong difference in the  
464 expression pattern of myogenic markers between these samples with NW animals  
465 inducing the expression of an important growth factor for skeletal muscle cells and  
466 the IUGR delaying the expression of signals that induces skeletal muscle  
467 myogenesis. Since the cells responsible for the expression of these markers were  
468 originated during the prenatal period, they may have been influenced by the uterine  
469 environment, as the embryo-fetal stage is crucial for skeletal muscle development  
470 [46]. In this sense, insults during prenatal development may affect gene expression  
471 related to myogenesis through DNA methylation which will have long lasting effects  
472 on postnatal development [26].

473 Since *PAX7* participates in regulating the behavior of skeletal stem cells [53],  
474 its deficiency might play an important role in myogenesis impairment. During  
475 postnatal development, *PAX7* is under expressed in IUGR animals, but not absent.  
476 Hence, it is reasonable to interpret that the recruitment of satellite cells to the  
477 myogenic lineage by *PAX7* was less intense. Consequently, *MYF5* and *MYOD* were  
478 under expressed and *MYOG*, a marker of terminal differentiation of the muscular  
479 lineage [54] as well as *DES*, were also under expressed. Therefore, it is suggested  
480 that the low expression of *PAX7* affected the myogenic program causing the early

481 closure of postnatal skeletal muscle myogenesis. This was shown by the immune  
482 fluorescence determination of the embryonic MyHC protein in the skeletal muscle  
483 tissue in 100-d and 150-d old IUGR pigs.

484 Finally, the presence of the embryonic MyHC protein isoform in IUGR adult  
485 muscle associated with the description of the myogenic regulatory factors deserve  
486 attention. The myogenic regulators described herein become candidates in the  
487 investigation of postnatal myogenic program to ensure the proper development of  
488 skeletal muscle in swine breeding programs and in human health. Although the  
489 conditions imposed by the intrauterine environment may cause skeletal muscle  
490 morphofunctional changes in IUGR individuals, future studies are necessary to  
491 investigate the mechanisms which limit postnatal muscle growth and develop  
492 strategies that might prevent the onset of diseases in later life.

493

## 494 **Acknowledgements**

495 The authors gratefully acknowledge Professor Cristina Guatimosim Fonseca from the  
496 Department of Morphology – ICB/UFMG for donating the antibodies and her scientific  
497 support during the immunofluorescence analyses and Joan Turchinsky (AFNS;  
498 University of Alberta) for the technical support she provided as a lab technologist for  
499 the research group.

500

## 501 **References**

- 502 1. Kiserud T, Benachi A, Hecher K, Perez R, Carvalho J et al. The World Health  
503 Organization fetal growth charts: concept, findings, interpretation, and

- 504 application. *Am J Obstet Gynecol.* 2018; 218: S619-S629.  
505 doi:10.1016/j.ajog.2017.12.010.
- 506 2. Novac MV, Niculescu M, Manolea MM, Dijmărescu AL, Iliescu DG, Novac MB,  
507 Rotaru LT, Stoenescu MF, Tabacu MC, Tudorache Ș, Busuioc CJ, Gheonea  
508 IA. Placental findings in pregnancies complicated with IUGR -  
509 histopathological and immunohistochemical analysis. *Rom J Morphol Embryol.*  
510 2018; 59 (3):715-720. PMID: 30534809.
- 511 3. Foxcroft G, Dixon W, Novak S, Putman C, Town S et al. The biological basis  
512 for prenatal programming of postnatal performance in pigs. *J Anim Sci.* 2006;  
513 84: E105-E112. doi:10.2527/2006.8413\_supple105x.
- 514 4. Campos PHRF, Silva BAN, Donzele JL, Oliveira RFM, Knol EF. Effects of sow  
515 nutrition during gestation on within-litter birth weight variation: a review.  
516 *Animal.* 2012; 6:5, 797-806.
- 517 5. Matheson SM, Walling GA, Edwards SA. Genetic selection against  
518 intrauterine growth retardation in piglets: a problem at the piglet level with a  
519 solution at the sow level. *Genetics Selection Evolution.* 2018; 50:46.  
520 doi:10.1186/s12711-018-0417-7.
- 521 6. Town S, Putman C, Turchinsky N, Dixon W, Foxcroft G. Number of  
522 conceptuses in utero affects porcine fetal muscle development. *Reproduction.*  
523 2004; 128: 443-454. doi:10.1530/rep.1.00069.
- 524 7. Bauer R, Walter B, Brust P, Füchtner F, Zwiener U. Impact of asymmetric  
525 intrauterine growth restriction on organ function in newborn piglets. *Eur J*  
526 *Obstet Gyn R B.* 2003; 110: S40-S49. doi:10.1016/s0301-2115(03)00171-4.
- 527 8. Wu G, Bazer F, Wallace J, Spencer T. BOARD-INVITED REVIEW:  
528 Intrauterine growth retardation: Implications for the animal sciences. *J Anim*  
529 *Sci.* 2006; 84: 2316-2337. doi:10.2527/jas.2006-156.
- 530 9. Gatford K, Smits R, Collins C, Argent C, De Blasio M et al. Maternal  
531 responses to daily maternal porcine somatotropin injections during early-mid  
532 pregnancy or early-late pregnancy in sows and gilts<sup>1</sup>. *J Anim Sci.* 2010; 88:  
533 1365-1378. doi:10.2527/jas.2009-2265.
- 534 10. Wang J. IUGR alters muscle fiber development and proteome in fetal pigs.  
535 *Front Biosci.* 2013; 18: 598. doi:10.2741/4123.
- 536 11. Nissen P, Oksbjerg N. Birth weight and postnatal dietary protein level affect  
537 performance, muscle metabolism and meat quality in pigs. *Animal.* 2011; 5:  
538 1382-1389. doi:10.1017/s1751731111000401.
- 539 12. Krueger R, Derno M, Goers S, Metzler-Zebeli B, Nuernberg G et al. Higher  
540 body fatness in intrauterine growth retarded juvenile pigs is associated with  
541 lower fat and higher carbohydrate oxidation during ad libitum and restricted  
542 feeding. *Eur J Nutr.* 2013; 53: 583-597. doi:10.1007/s00394-013-0567-x.
- 543 13. Ferenc K, Pietrzak P, Godlewski M, Piwowarski J, Kilińczyk R et al.  
544 Intrauterine growth retarded piglet as a model for humans – Studies on the  
545 perinatal development of the gut structure and function. *Reprod Biol.* 2014; 14:  
546 51-60. doi:10.1016/j.repbio.2014.01.005.
- 547 14. Swanson A, David A. Animal models of fetal growth restriction: Considerations  
548 for translational medicine. *Placenta.* 2015; 36: 623-630.  
549 doi:10.1016/j.placenta.2015.03.003.
- 550 15. Manikkam M, Crespi E, Doop D, Herkimer C, Lee J et al. Fetal Programming:  
551 Prenatal Testosterone Excess Leads to Fetal Growth Retardation and  
552 Postnatal Catch-Up Growth in Sheep. *Endocrinology.* 2004; 145: 790-798.  
553 doi:10.1210/en.2003-0478.



- 554 16. Yan X, Zhu M, Dodson M, Du M. Developmental Programming of Fetal  
555 Skeletal Muscle and Adipose Tissue Development. *J Genomics*. 2013; 1: 29-  
556 38. doi:10.7150/jgen.3930.
- 557 17. Alvarenga A, Chiarini-Garcia H, Cardeal P, Moreira L, Foxcroft G et al. Intra-  
558 uterine growth retardation affects birthweight and postnatal development in  
559 pigs, impairing muscle accretion, duodenal mucosa morphology and carcass  
560 traits. *Reprod Fert Develop*. 2012; 25: 387. doi:10.1071/rd12021.
- 561 18. Wan H, Zhu J, Su G, Liu Y, Hua L et al. Dietary supplementation with  $\beta$ -  
562 hydroxy- $\beta$ -methylbutyrate calcium during the early postnatal period  
563 accelerates skeletal muscle fibre growth and maturity in intra-uterine growth-  
564 retarded and normal-birth-weight piglets. *Brit J Nutr*. 2016; 115: 1360-1369.  
565 doi:10.1017/s0007114516000465.
- 566 19. Năstase L, Cretoi D, Stoicescu SM. Skeletal muscle damage in intrauterine  
567 growth restriction. *Adv Exp Med Biol*. 2018; 1088:93-106. doi: 10.1007/978-  
568 981-13-1435-3\_5.
- 569 20. Perruchot M, Lefaucheur L, Louveau I, Mobuchon L, Palin M et al. Delayed  
570 muscle development in small pig fetuses around birth cannot be rectified by  
571 maternal early feed restriction and subsequent overfeeding during gestation.  
572 *Animal*. 2015; 9: 1996-2005. doi:10.1017/s1751731115001202.
- 573 21. Chal J, Pourquié O. Making muscle: skeletal myogenesis in vivo and in vitro.  
574 *Development*. 2017; 144: 2104-2122. doi:10.1242/dev.151035.
- 575 22. Bentzinger C, von Maltzahn J, Rudnicki M. Extrinsic regulation of satellite cell  
576 specification. *Stem Cell Res Ther*. 2010; 1: 27. doi:10.1186/scrt27.
- 577 23. Kuang S, Rudnicki M. The emerging biology of satellite cells and their  
578 therapeutic potential. *Trends Mol Med*. 2008; 14: 82-91.  
579 doi:10.1016/j.molmed.2007.12.004.
- 580 24. Zammit P. Function of the myogenic regulatory factors Myf5, MyoD, Myogenin  
581 and MRF4 in skeletal muscle, satellite cells and regenerative myogenesis.  
582 *Semin Cell Dev Biol*. 2017; 72: 19-32. doi:10.1016/j.semcdb.2017.11.011.
- 583 25. Auler P, Moreira G, Hogg C, Ashworth C, Bortolozzo F et al. Testicular  
584 parameters and spermatogenesis in different birthweight boars. *Reprod Fert*  
585 *Develop*. 2017; 29: 1720. doi:10.1071/rd16164.
- 586 26. Foxcroft G, Dixon W, Novak S, Putman C, Town S et al. The biological basis  
587 for prenatal programming of postnatal performance in pigs 1,2. *J Anim Sci*.  
588 2006; 84: E105-E112. doi:10.2527/2006.8413\_supple105x.
- 589 27. CHIARINI-GARCIA, H.; PARREIRA, G. G.; ALMEIDA, F. R. C. L. Glycol  
590 methacrylate embedding for improved morphological, morphometrical and  
591 immunohistochemical investigations under light microscopy: testes as a  
592 model. In: CHIARINI-GARCIA, H.; MELO, R. C. N. *Light Microscopy: Methods*  
593 *and Protocols*. Humana Press: Totowa, New Jersey. p. 3-18. 2011.
- 594 28. Dubache-Powell J: Quantitative Determination of Muscle Fiber Diameter  
595 (Minimal Feret's Diameter) and Percentage of Centralized Nuclei. TREAT-  
596 NMD Neuromuscular Network SOP M.1.2\_001. Washington, DC: Wellstone  
597 Muscular Dystrophy Center, 2008.
- 598 29. Szklarczyk D, Morris J, Cook H, Kuhn M, Wyder S et al. The STRING  
599 database in 2017: quality-controlled protein-protein association networks,  
600 made broadly accessible. *Nucleic Acids Res*. 2016; 45: D362-D368.  
601 doi:10.1093/nar/gkw937.
- 602 30. Yokoyama S, Asahara H. The myogenic transcriptional network. *Cell Mol Life*  
603 *Sci*. 2011; 68: 1843-1849. doi:10.1007/s00018-011-0629-2.

- 604 31. Sabourin L, Rudnicki M. The molecular regulation of myogenesis. *Clin Genet.*  
605 2001; 57: 16-25. doi:10.1034/j.1399-0004.2000.570103.x.
- 606 32. Deng B, Zhang F, Wen J, Ye S, Wang L et al. The function of myostatin in the  
607 regulation of fat mass in mammals. *Nutr Metab.* 2017; 14.  
608 doi:10.1186/s12986-017-0179-1.
- 609 33. Li M, Chen L, Tian S, Lin Y, Tang Q et al. Comprehensive variation discovery  
610 and recovery of missing sequence in the pig genome using multiple de novo  
611 assemblies. *Genome Res.* 2016; 27: 865-874. doi:10.1101/gr.207456.116.
- 612 34. Goldmann W. Intermediate filaments and cellular mechanics. *Cell Biol Int.*  
613 2018; 42: 132-138. doi:10.1002/cbin.10879.
- 614 35. Buckingham M, Relaix F. PAX3 and PAX7 as upstream regulators of  
615 myogenesis. *Semin Cell Dev Biol.* 2015; 44: 115-125.  
616 doi:10.1016/j.semcdb.2015.09.017.
- 617 36. Untergasser G, Gander R, Lilg C, Lepperdinger G, Plas E et al. Profiling  
618 molecular targets of TGF- $\beta$ 1 in prostate fibroblast-to-myofibroblast  
619 transdifferentiation. *Mech Ageing Dev.* 2005; 126: 59-69.  
620 doi:10.1016/j.mad.2004.09.023.
- 621 37. Hildyard J, Wells D. Identification and Validation of Quantitative PCR  
622 Reference Genes Suitable for Normalizing Expression in Normal and  
623 Dystrophic Cell Culture Models of Myogenesis. *PLoS Currents.* 2014;  
624 doi:10.1371/currents.md.faafdde4bea8df4aa7d06cd5553119a6.
- 625 38. Hotamisligil G, Bernlohr D. Metabolic functions of FABPs—mechanisms and  
626 therapeutic implications. *Nat Rev Endocrinol.* 2015; 11: 592-605.  
627 doi:10.1038/nrendo.2015.122.
- 628 39. Furuhashi M, Saitoh S, Shimamoto K, Miura T. Fatty Acid-Binding Protein 4  
629 (FABP4): Pathophysiological Insights and Potent Clinical Biomarker of  
630 Metabolic and Cardiovascular Diseases. *Clinical Medicine Insights:  
631 Cardiology.* 2014; 8s3: CMC.S17067. doi:10.4137/cmc.s17067.
- 632 40. Yang X, Yu B, Mao X, Zheng P, He J et al. Lean and obese pig breeds exhibit  
633 differences in prenatal gene expression profiles of muscle development.  
634 *Animal.* 2014; 9: 28-34. doi:10.1017/s1751731114002316.
- 635 41. Nierobisz L, Sporer K, Strasburg G, Reed K, Velleman S et al. Differential  
636 expression of genes characterizing myofibre phenotype. *Animal Genet.* 2011;  
637 43: 298-308. doi:10.1111/j.1365-2052.2011.02249.x.
- 638 42. Pierzchała M, Pareek C, Urbański P, Goluch D, Kamyczek M et al. Study of  
639 the differential transcription in liver of growth hormone receptor (GHR), insulin-  
640 like growth factors (IGF1, IGF2) and insulin-like growth factor receptor  
641 (IGF1R) genes at different postnatal developmental ages in pig breeds. *Mol  
642 Biol Rep.* 2011; 39: 3055-3066. doi:10.1007/s11033-011-1068-8.
- 643 43. Tasaki M, Villani V, Shimizu A, Sekijima M, Yamada R et al. Role of Bone  
644 Marrow Maturity, Insulin-Like Growth Factor 1 Receptor, and Forkhead  
645 Box Protein N1 in Thymic Involution and Rejuvenation. *Am J Transplant.*  
646 2016; 16: 2877-2891. doi:10.1111/ajt.13855.
- 647 44. Naia L, Ferreira I, Cunha-Oliveira T, Duarte A, Ribeiro M et al. Activation of  
648 IGF-1 and Insulin Signaling Pathways Ameliorate Mitochondrial Function and  
649 Energy Metabolism in Huntington's Disease Human Lymphoblasts. *Mol  
650 Neurobiol.* 2014; 51: 331-348. doi:10.1007/s12035-014-8735-4.
- 651 45. Livak K, Schmittgen T. Analysis of Relative Gene Expression Data Using  
652 Real-Time Quantitative PCR and the  $2^{-\Delta\Delta CT}$  Method. *Methods.* 2001; 25:  
653 402-408. doi:10.1006/meth.2001.1262.

- 654 46. Yan X, Zhu M, Dodson M, Du M. Developmental Programming of Fetal  
655 Skeletal Muscle and Adipose Tissue Development. *J Genomics*. 2013; 1: 29-  
656 38. doi:10.7150/jgen.3930.
- 657 47. Wan H, Zhu J, Su G, Liu Y, Hua L et al. Dietary supplementation with  $\beta$ -  
658 hydroxy- $\beta$ -methylbutyrate calcium during the early postnatal period  
659 accelerates skeletal muscle fibre growth and maturity in intra-uterine growth-  
660 retarded and normal-birth-weight piglets. *Brit J Nutr*. 2016; 115: 1360-1369.  
661 doi:10.1017/s0007114516000465.
- 662 48. Oksbjerg N, Nissen P, Therkildsen M, Møller H, Larsen L et al. Meat Science  
663 and Muscle Biology Symposium: In utero nutrition related to fetal  
664 development, postnatal performance, and meat quality of pork1. *J Anim Sci*.  
665 2013; 91: 1443-1453. doi:10.2527/jas.2012-5849.
- 666 49. Madsen J, Pardo C, Kreuzer M, Bee G. Impact of dietary l-arginine supply  
667 during early gestation on myofiber development in newborn pigs exposed to  
668 intra-uterine crowding. *J Anim Sci Biotech*. 2017. doi:10.1186/s40104-017-  
669 0188-y.
- 670 50. Choi Y, Kim B. Muscle fiber characteristics, myofibrillar protein isoforms, and  
671 meat quality. *Livest Sci*. 2009; 122: 105-118. doi:10.1016/j.livsci.2008.08.015.
- 672 51. Shen L, Luo J, Lei H, Jiang Y, Bai L et al. Effects of muscle fiber type on  
673 glycolytic potential and meat quality traits in different Tibetan pig muscles and  
674 their association with glycolysis-related gene expression. *Genet Mol Res*.  
675 2015; 14: 14366-14378. doi:10.4238/2015.november.13.22.
- 676 52. Alvarenga A, Sousa R, Parreira G, Chiarini-Garcia H, Almeida F. Fatty acid  
677 profile, oxidative stability of pork lipids and meat quality indicators are not  
678 affected by birth weight. *Animal*. 2014; 8: 660-666.  
679 doi:10.1017/s1751731114000093.
- 680 53. Lagha M, Sato T, Bajard L, Daubas P, Esner M et al. Regulation of Skeletal  
681 Muscle Stem Cell Behavior by Pax3 and Pax7. *Cold Spring Harb Sym*. 2008;  
682 73: 307-315. doi:10.1101/sqb.2008.73.006.
- 683 54. Hasty P, Bradley A, Morris J, Edmondson D, Venuti J et al. Muscle deficiency  
684 and neonatal death in mice with a targeted mutation in the myogenin gene.  
685 *Nature*. 1993; 364: 501-506. doi:10.1038/364501a0.

686

687

## 688 **Supporting information**

689 **S1 Table. qPCR calibration curve data.** The slope, intercept, efficiency and R2 are  
690 presented.

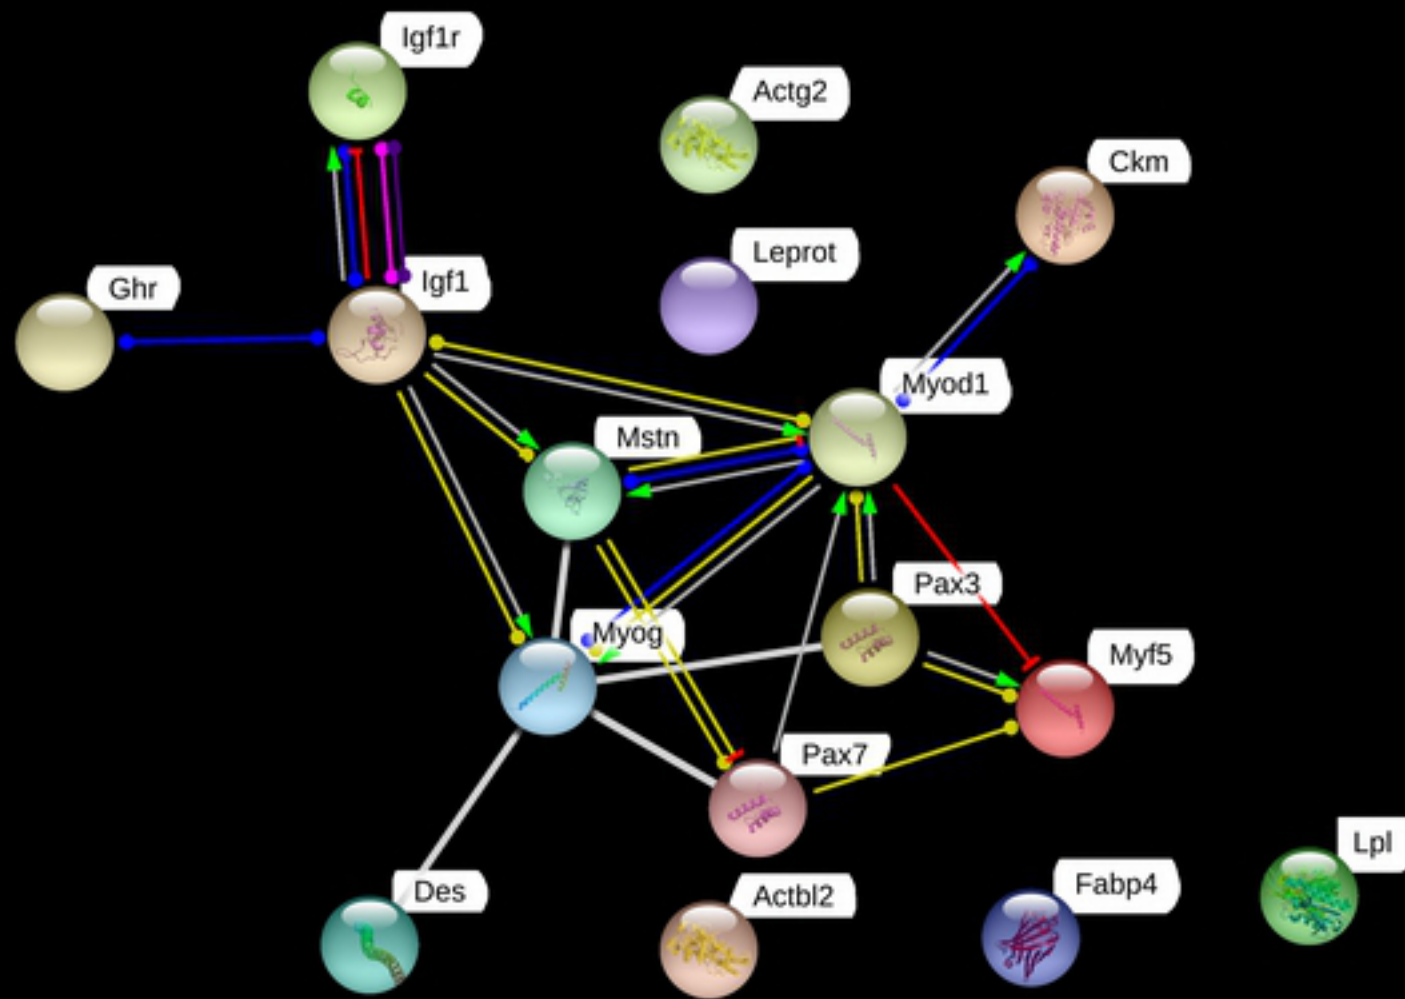

Figure 1

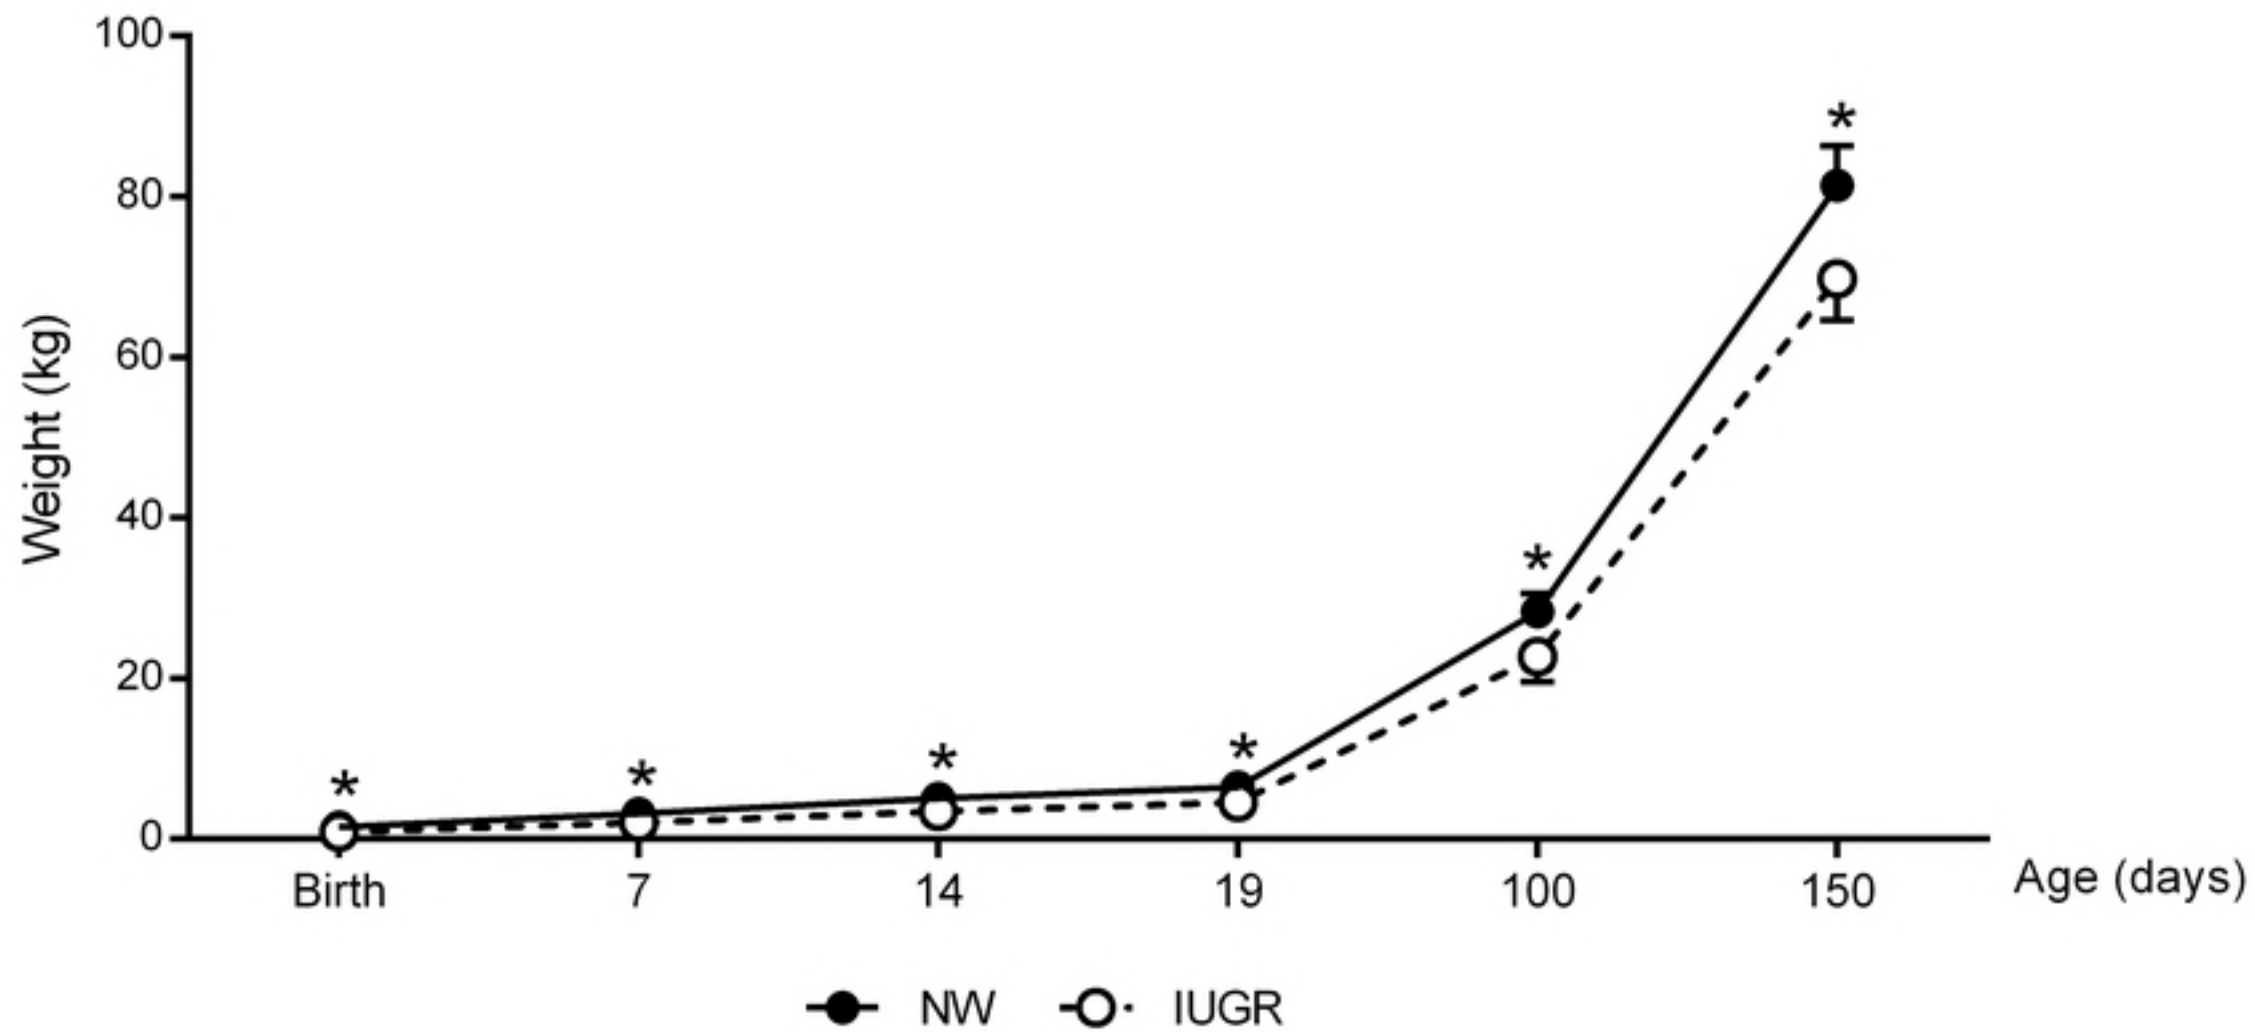

Figure 2

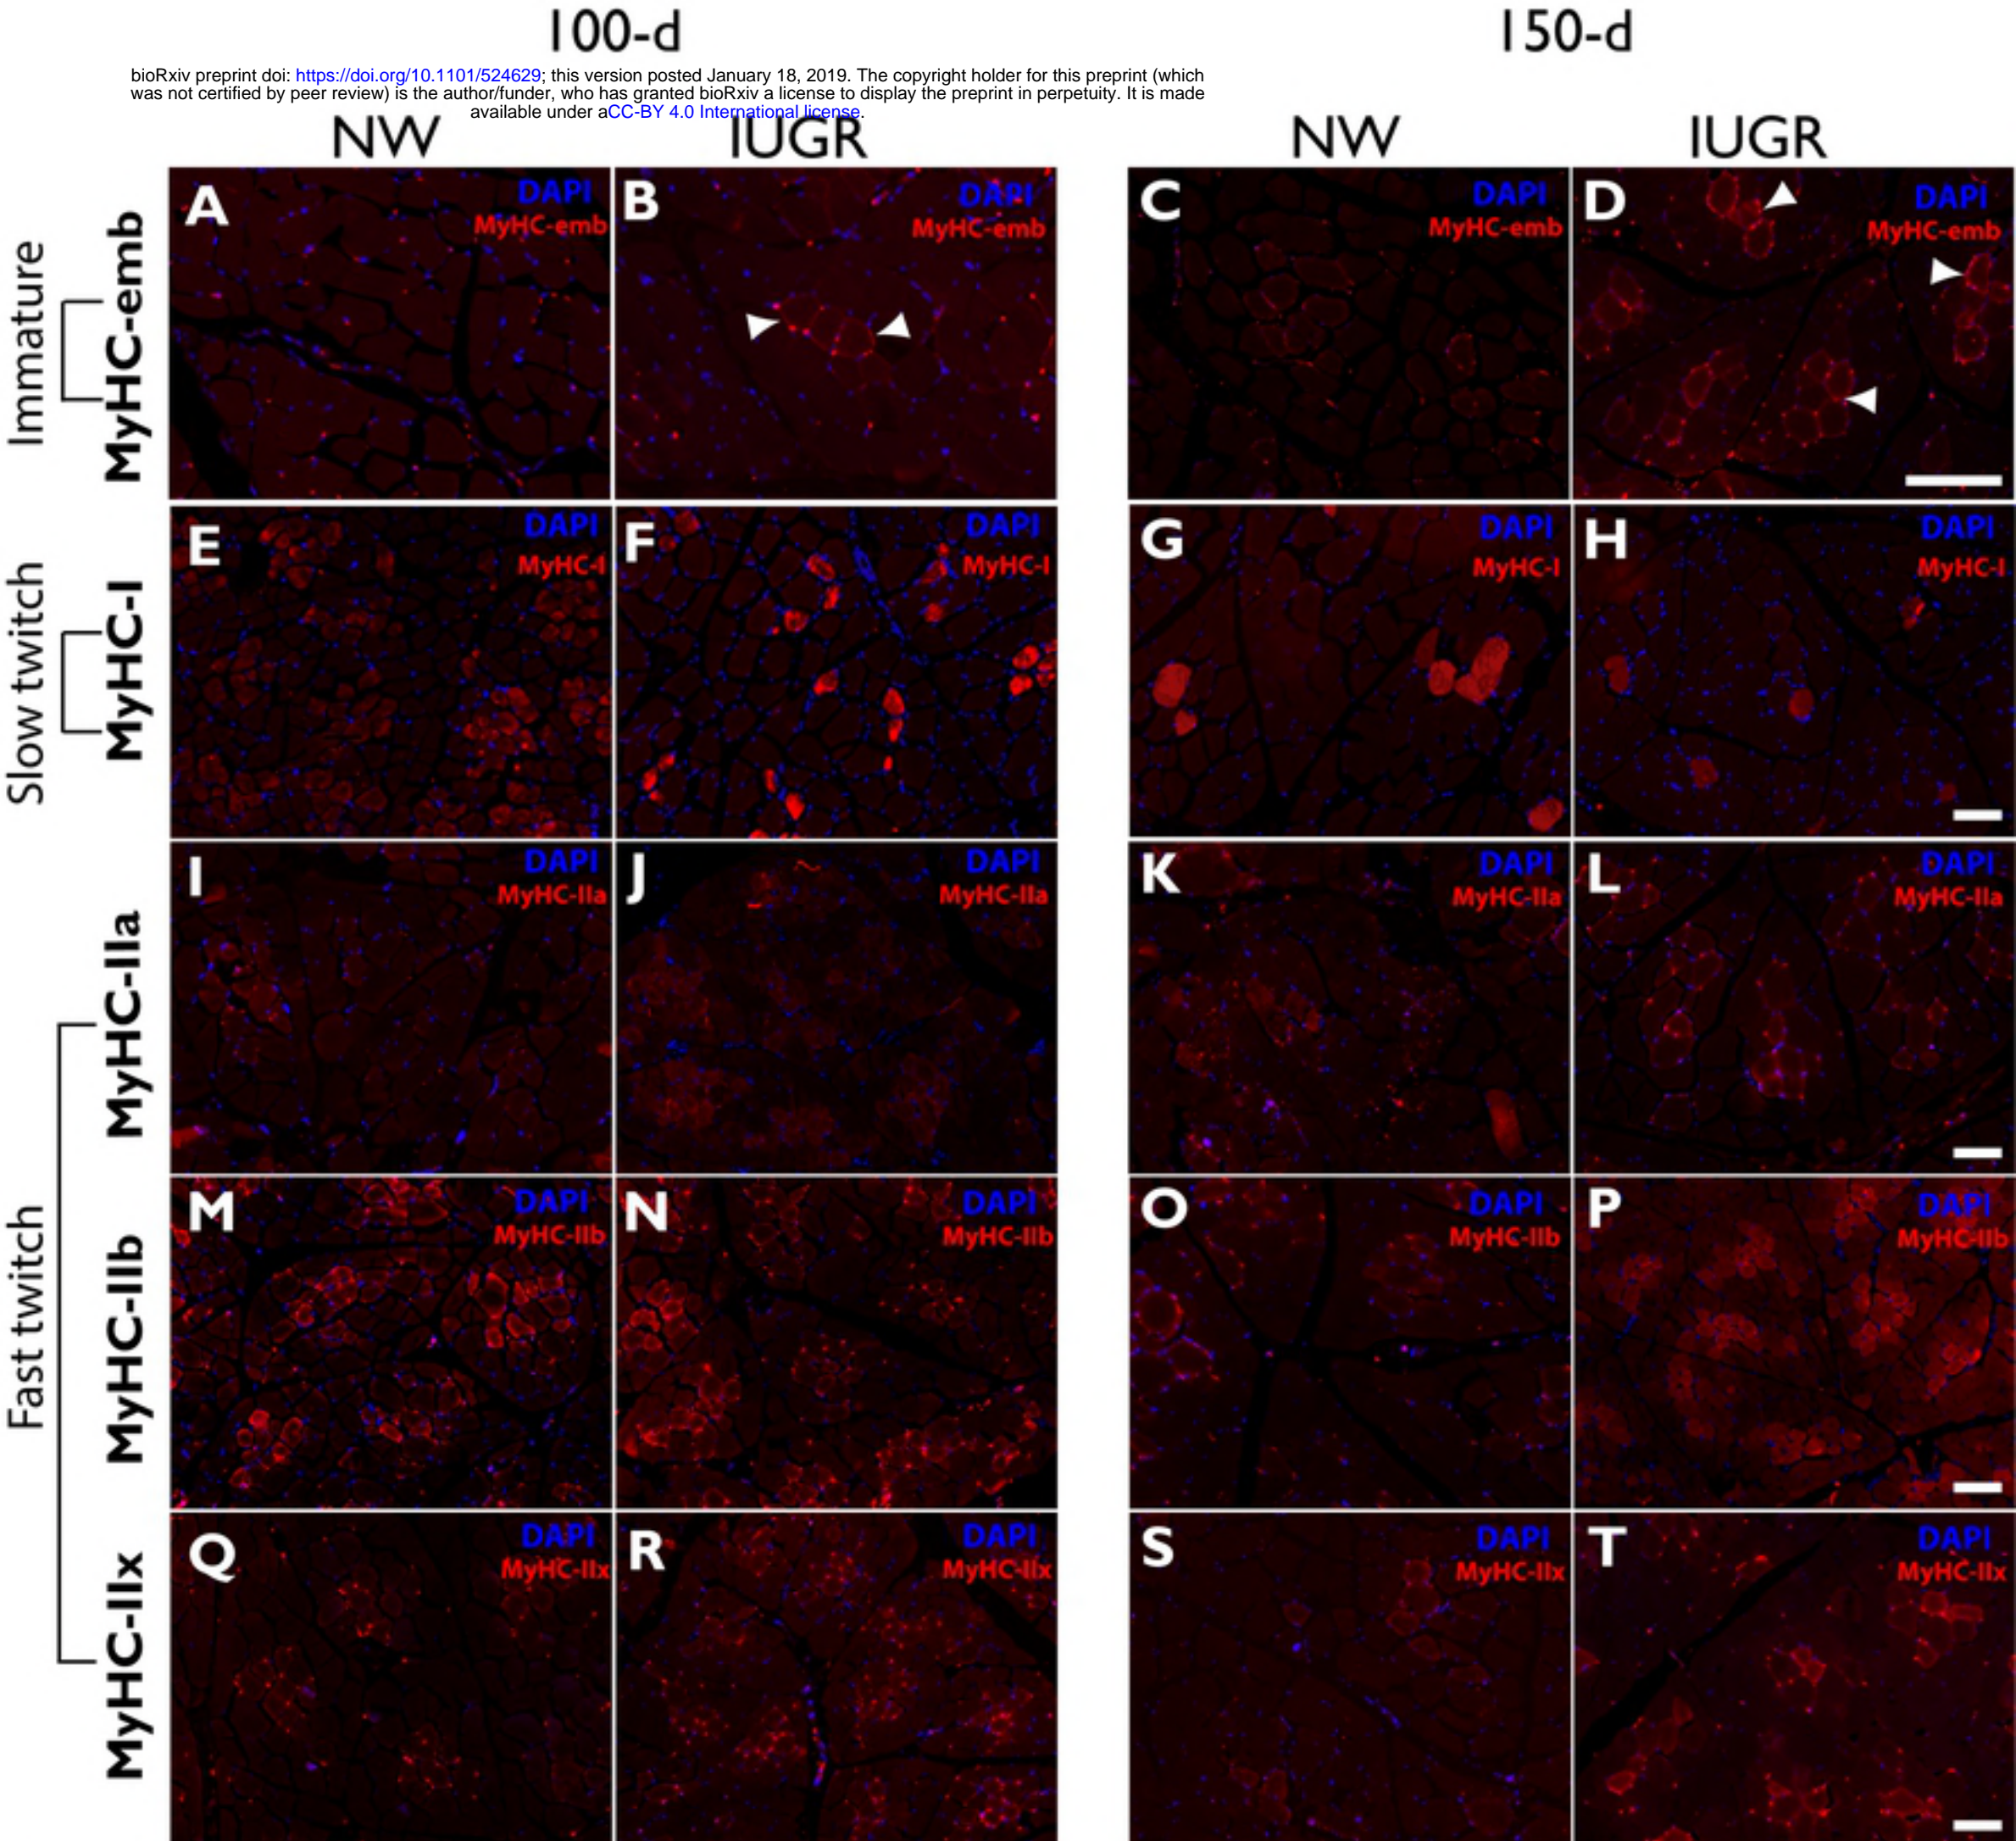

Figure 3

**NW****IUGR**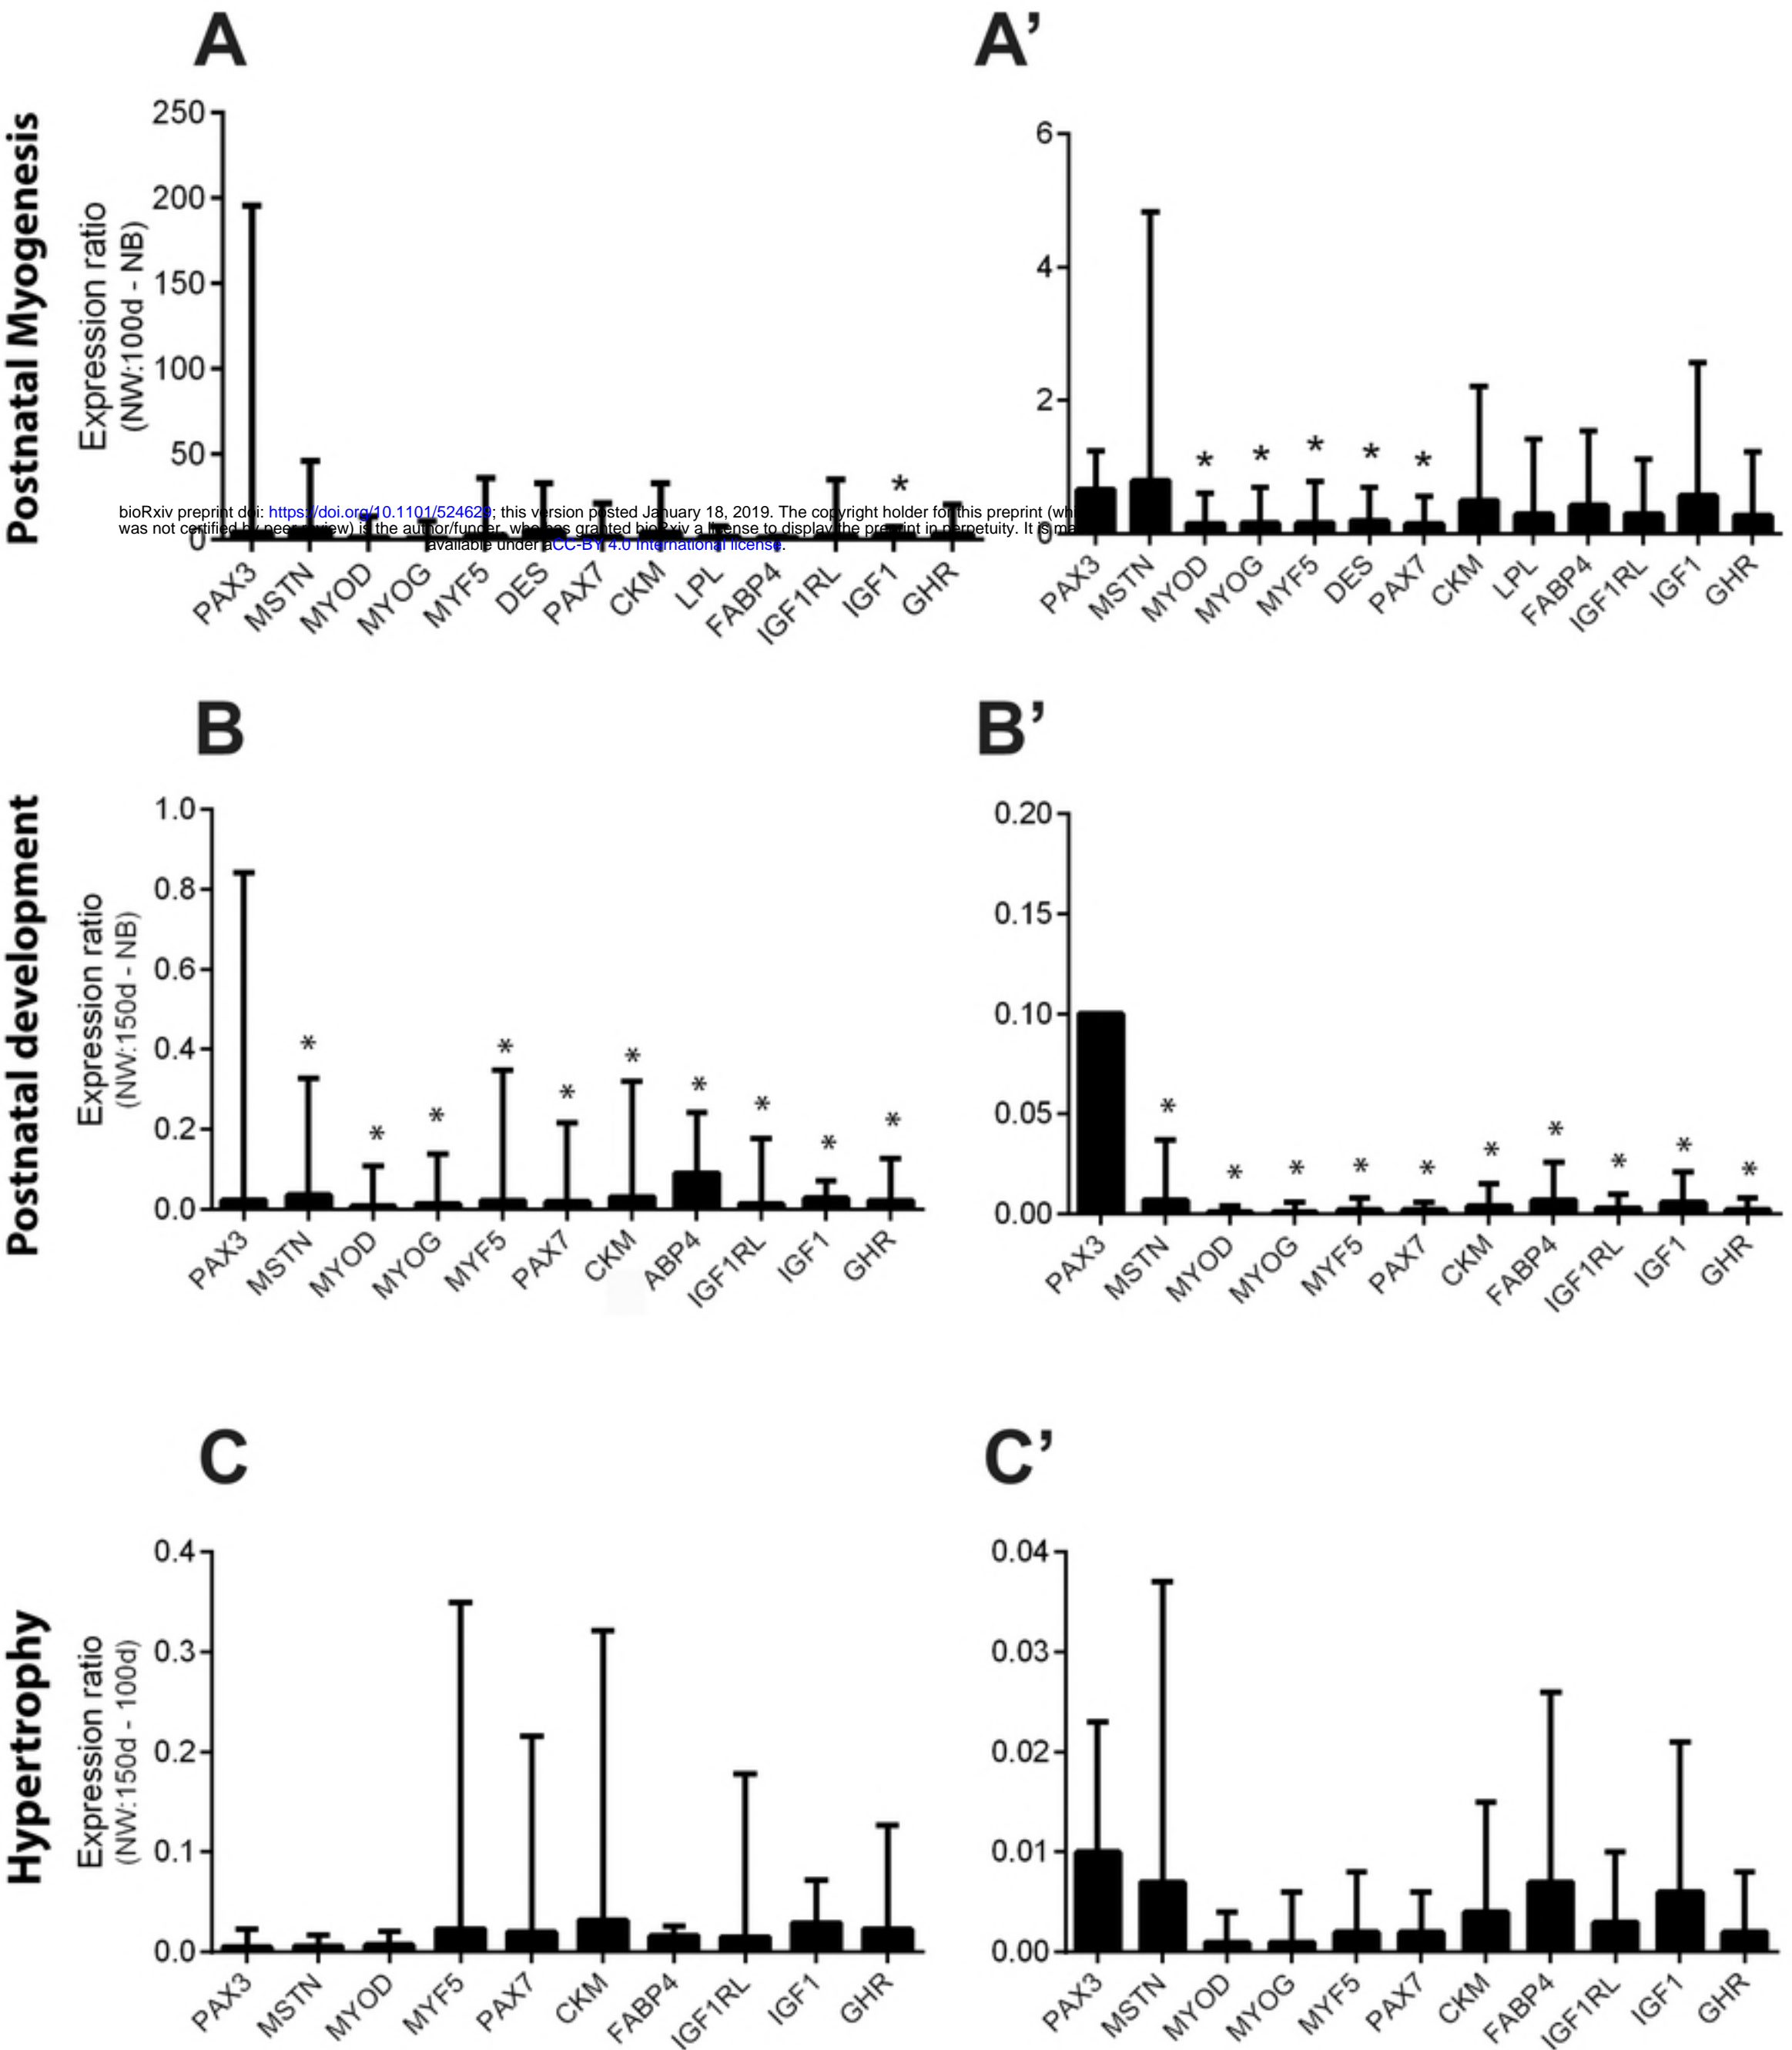

Figure 4
